# Supplementary material for: Assessing the In Vitro Digestion of Lactoferrin-Curcumin Nanoparticles Using the Realistic Gastric Model
Source: MDPI journal article supplement (doi:10.3390/nano13152237), 2023-08-02
Supplement: s1 [file s1]

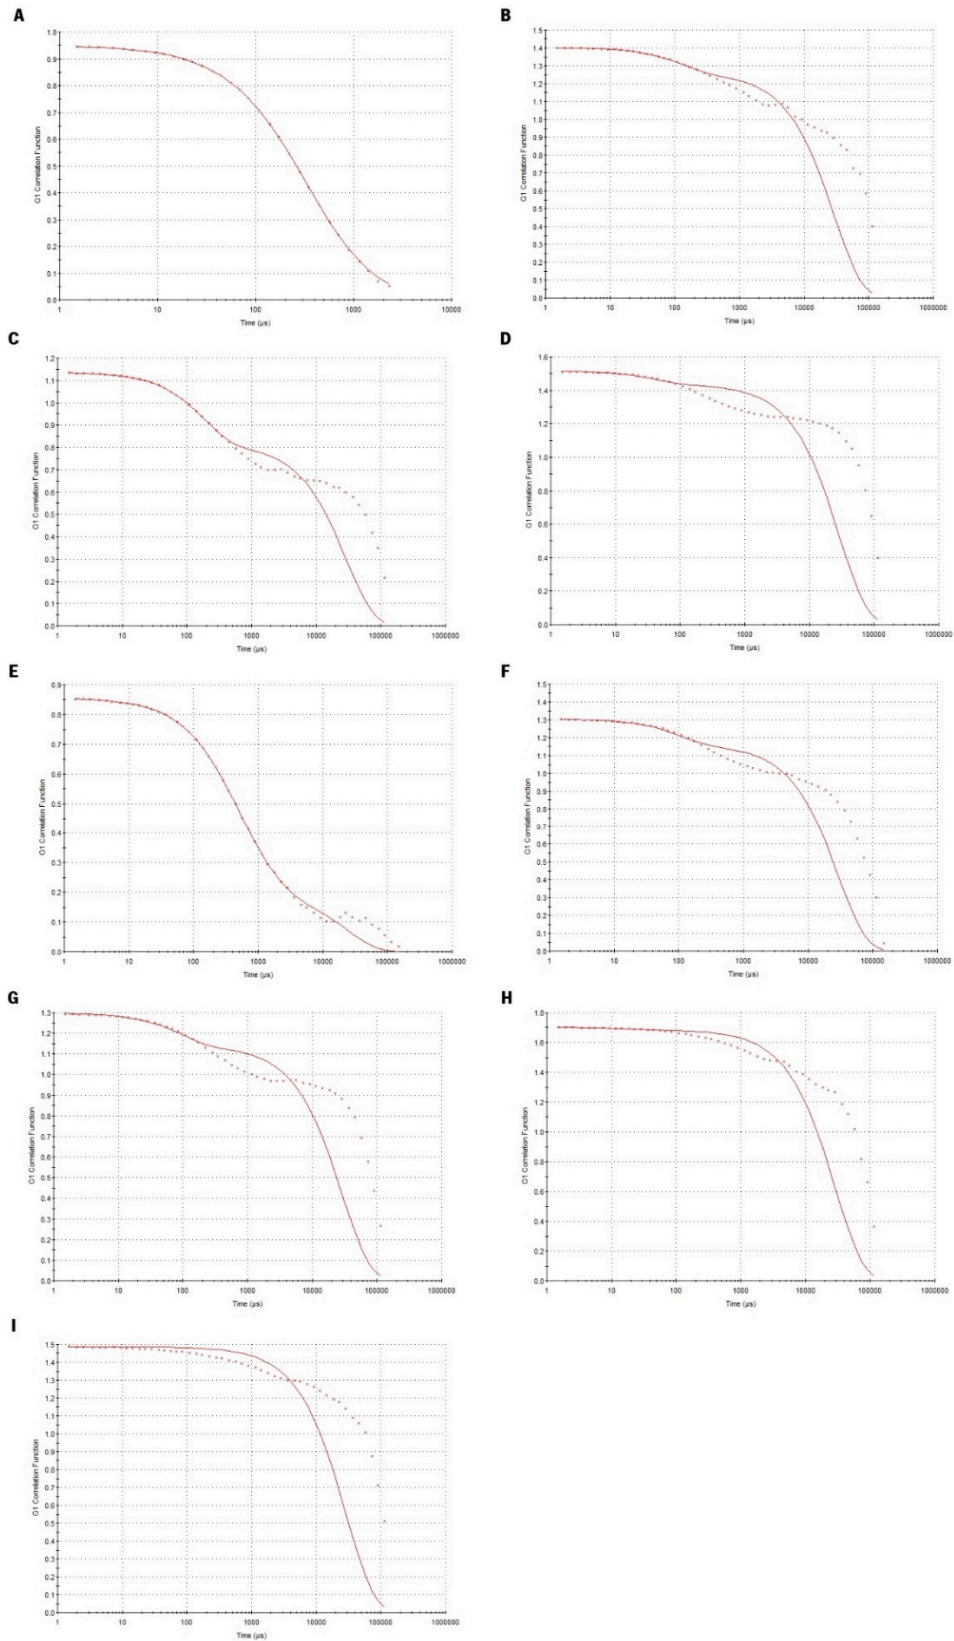

**Figure S1** – DLS distribution fit for Lf-curcumin samples before (A) and the digestion process where the letters from B to I correspond to the stomach emptying from 1 to 8, respectively.
